# Supplementary material for: A Phytophthora sojae cytoplasmic effector mediates disease resistance and abiotic stress tolerance in Nicotiana benthamiana
Source: PubMed Central journal article supplement (PMC4454142; doi:10.1038/srep10837), 2015-06-03
Supplement: srep10837-s1.pdf [file srep10837-s1.pdf]

***A Phytophthora sojae cytoplasmic effector mediates disease resistance and abiotic stress tolerance in Nicotiana benthamiana***

Meixiang Zhang<sup>†</sup>, Nasir Ahmed Rajput<sup>†</sup>, Danyu Shen, Peng Sun, Wentao Zeng, Tingli Liu, Joseph Juma Mafurah, Daolong Dou\*

Department of Plant Pathology, Nanjing Agricultural University, Nanjing, China

**Additional title page Footnotes**

<sup>†</sup>, M.Z. and N.A.R. contributed equally to this work.

\*To whom all correspondence should be sent:

Name: **Daolong Dou**

Address: #1 Weigang Rd, Nanjing Agricultural University, Nanjing, China

Telephone number: +86-025-84396973

e-mail address: [ddou@njau.edu.cn](mailto:ddou@njau.edu.cn)

## Supplementary information

### Supplementary figures

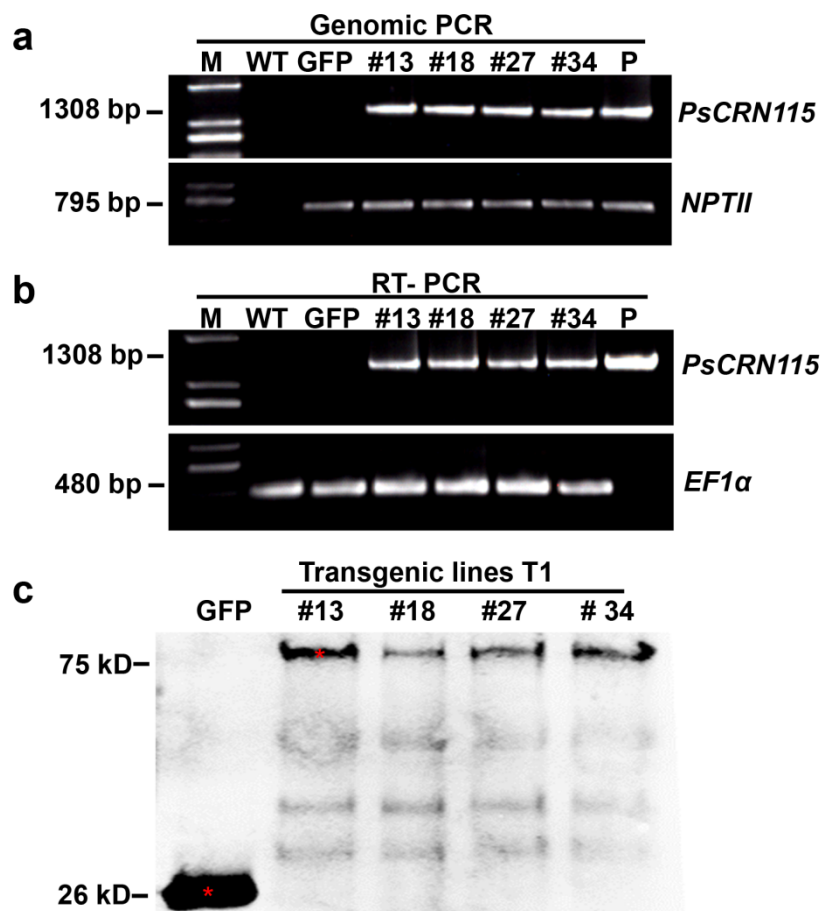

**Figure S1. Generation of the *PsCRN115*-transgenic *N. benthamiana*.** (a) Confirmation of transgene integration by genomic PCR. (b) Detection of *PsCRN115* expression in transgenic plants using RT-PCR. M, DNA marker; WT, wild-type *N. benthamiana*; GFP, *GFP*-transgenic *N. benthamiana*; #13, #18, #27 and #34, four independent *PsCRN115*-transgenic lines; P, the plasmid used for transformation as a positive control. *EF1 $\alpha$* , *N. benthamiana* internal reference gene *NbEF1 $\alpha$* . (c) Detection of GFP: *PsCRN115* protein expression using Western blot. The expected target bands were indicated by asterisks.

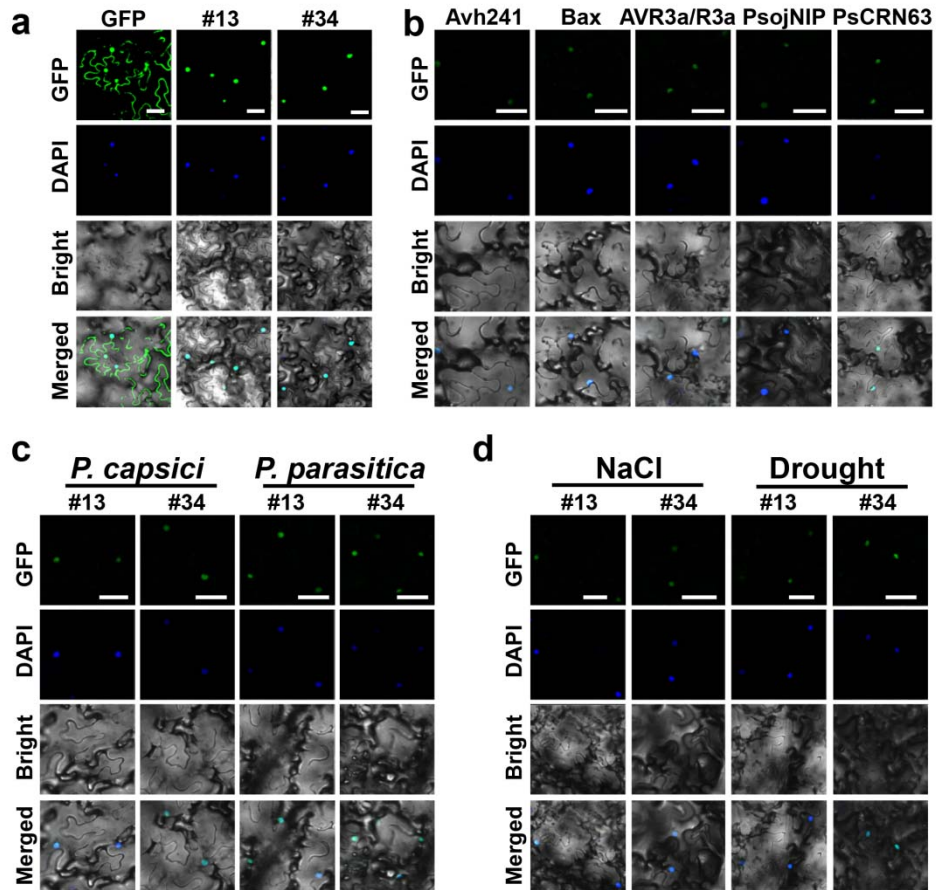

**Figure S2. Subcellular localization of GFP:PsCRN115 fusion protein in transgenic *N. benthamiana* under normal and stress conditions.** The pictures were taken using a confocal microscope. DAPI staining was used to show the nuclei. Scale bar represents 50  $\mu\text{m}$ .

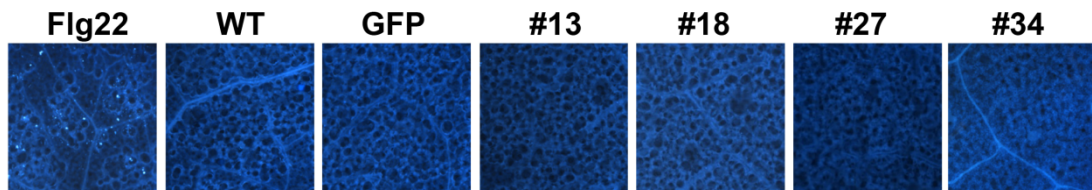

**Figure S3. Detection of callose deposition in *PsCRN115*-transgenic *N. benthamiana*.** Leaves treated with flg22 (40  $\mu\text{M}$ ) was used as positive controls. Callose deposits were detected by aniline blue staining, and visualised under a UV epifluorescence microscope (Olympus BX71).

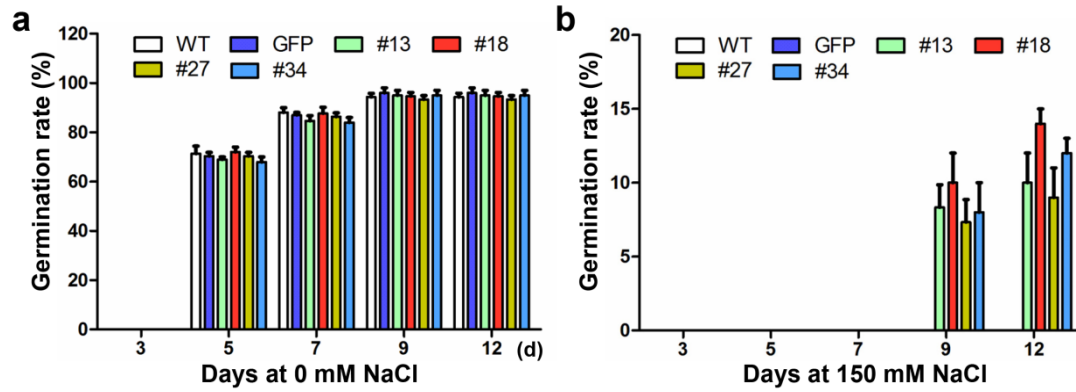

**Figure S4. Germination rates of plants under salt stress.** (a) Seed germination on MS medium containing 0 mM NaCl. (b) Seed germination on MS medium containing 150 mM NaCl. The results were based on daily scoring. The presented data are means  $\pm$  SE of three independent experiments.

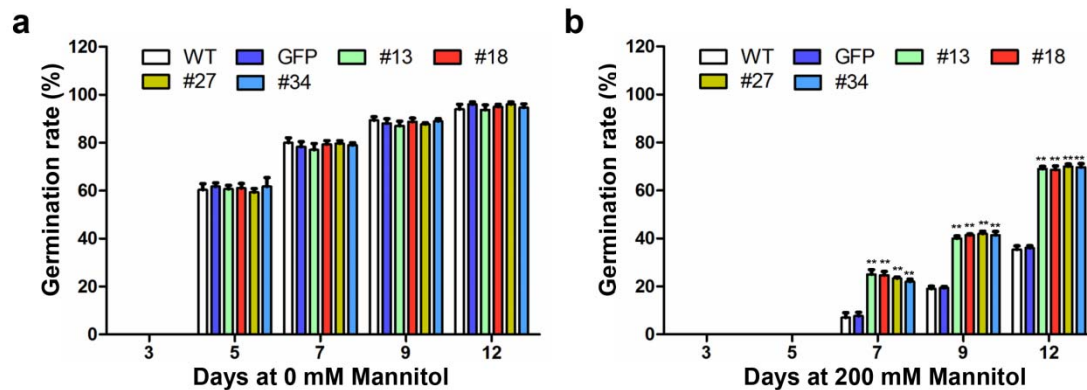

**Figure S5. Germination rates of plants under mannitol treatment.** (a) Seed germination on MS medium containing 0 mM mannitol. (b) Seed germination on MS medium containing 200 mM mannitol. The results were based on daily scoring. The presented data are means  $\pm$  SE of three independent experiments. Statistical significance was determined by Dunnett's test (\*\*,  $P < 0.01$ ).

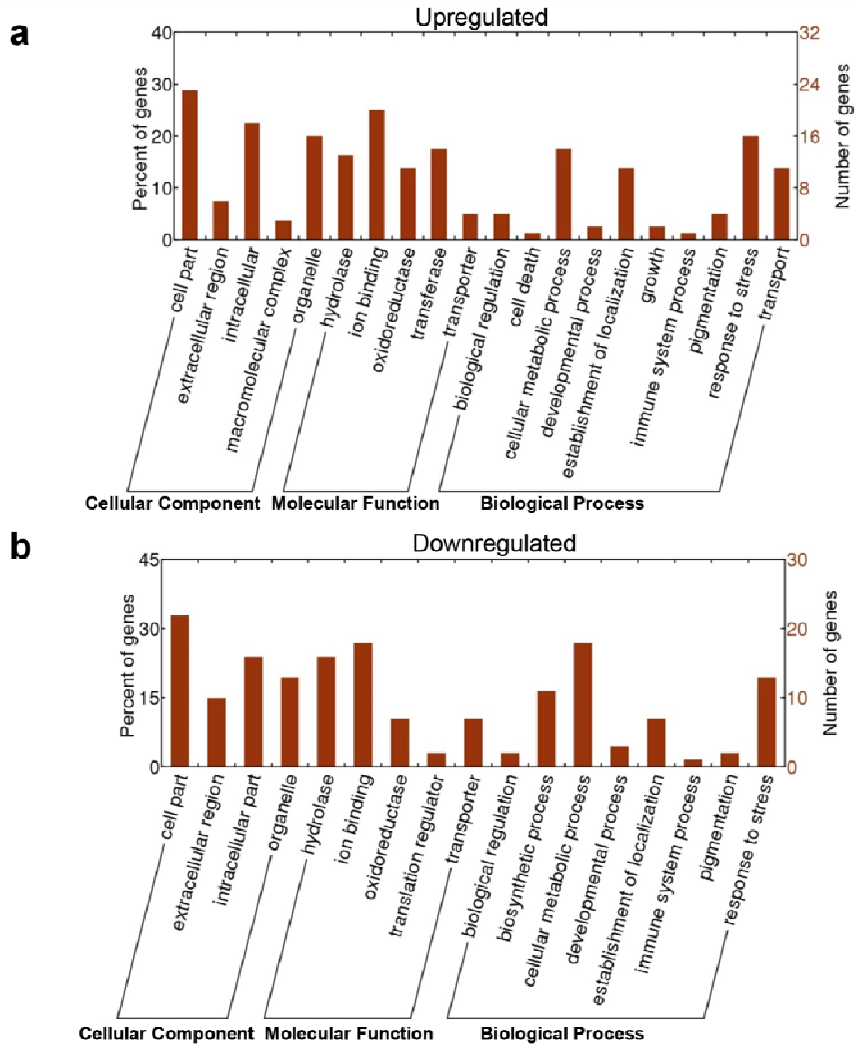

**Figure S6. GO categories of the differentially expressed genes.**

## Supplementary tables

**Table S1 Differentially expressed genes in *PsCRN115*-transgenic *N. benthamiana* compared to *GFP* lines.**

| Gene ID            | GFP RPKM | PsCRN115 RPKM | Fold Change PsCRN115/GFP | GFL0D value | Annotation                                                   | Validated by qPCR |
|--------------------|----------|---------------|--------------------------|-------------|--------------------------------------------------------------|-------------------|
| NbS00040499g0025.1 | 0.13     | 0.84          | 4.01                     | -1.02192    | Myosin XI F                                                  |                   |
| NbS00004242g0002.1 | 2.06     | 8.57          | 4.02                     | -1.34192    | Aspartic proteinase nepenthesin 1                            |                   |
| NbS00001592g0014.1 | 0.32     | 1.60          | 4.03                     | -1.09157    | Alkaline alpha galactosidase seed imbibition protein         |                   |
| NbS00003883g0012.1 | 7.12     | 29.11         | 4.05                     | -1.56687    | 2 oxoglutarate/FeII dependent dioxygenase                    |                   |
| NbS00009622g0029.1 | 4.17     | 17.21         | 4.05                     | -1.47845    | Auxin induced protein PCNT115                                |                   |
| NbS00001880g0007.1 | 1.18     | 5.09          | 4.07                     | -1.20612    | Plastid lipid associated protein PAP/fibrillin               |                   |
| NbS00016847g0019.1 | 1.29     | 5.58          | 4.07                     | -1.13822    | Outer membrane lipoprotein blc                               |                   |
| NbS00019641g0010.1 | 2.67     | 11.22         | 4.09                     | -1.42264    | Hydroxyproline rich glycoprotein                             |                   |
| NbS00054960g0005.1 | 0.99     | 4.37          | 4.10                     | -1.08551    | UDP glucose salicylic acid glucosyltransferase               |                   |
| NbS00012114g0012.1 | 0.66     | 3.02          | 4.10                     | -1.2285     | Cellulose synthase C1 2 glycosyltransferase family 2 protein |                   |
| NbS00047765g0005.1 | 1.06     | 4.66          | 4.10                     | -1.39668    | Serine/threonine protein kinase                              |                   |
| NbS00044318g0004.1 | 131.36   | 541.42        | 4.12                     | -1.80256    | Proline rich protein                                         |                   |
| NbS00016396g0001.1 | 77.30    | 319.63        | 4.13                     | -1.75701    | Basic form of pathogenesis related protein 1                 |                   |
| NbS00025703g0006.1 | 5.45     | 23.36         | 4.22                     | -1.60571    | Xyloglucan endotransglucosylase                              |                   |
| NbS00011039g0009.1 | 0.75     | 3.51          | 4.24                     | -1.20692    | RNA polymerase sigma 70 factor                               |                   |
| NbS00009031g0001.1 | 4.21     | 18.42         | 4.29                     | -1.33758    | Uncharacterized protein                                      |                   |
| NbS00006819g0015.1 | 0.93     | 4.35          | 4.32                     | -1.23695    | Trigger factor protein                                       |                   |
| NbS00028015g0007.1 | 0.58     | 2.87          | 4.34                     | -1.39856    | Pentatricopeptide repeat containing protein chloroplastic    |                   |

|                    |       |        |      |          |                                                                   |  |
|--------------------|-------|--------|------|----------|-------------------------------------------------------------------|--|
| NbS00018253g0004.1 | 3.17  | 14.09  | 4.35 | -1.57096 | Cytochrome P450                                                   |  |
| NbS00012812g0001.1 | 23.29 | 101.66 | 4.35 | -1.77301 | Pathogenesis related protein STH 2                                |  |
| NbS00019467g0006.1 | 1.41  | 6.46   | 4.35 | -1.27689 | Heavy metal associated domain containing protein expressed        |  |
| NbS00029493g0011.1 | 2.70  | 12.19  | 4.38 | -1.18145 | Basic 7S globulin 2                                               |  |
| NbS00000009g0012.1 | 1.25  | 5.83   | 4.39 | -1.64879 | ABC transporter G family member 36                                |  |
| NbS00022963g0016.1 | 0.68  | 3.34   | 4.41 | -1.28236 | Lysosomal Pro X carboxypeptidase                                  |  |
| NbS00029380g0012.1 | 2.60  | 11.89  | 4.44 | -1.68135 | Protein CHUP1 chloroplastic                                       |  |
| NbS00016427g0019.1 | 0.35  | 1.94   | 4.51 | -1.72384 | Unknown protein                                                   |  |
| NbS00024265g0004.1 | 4.51  | 20.79  | 4.53 | -1.70263 | Pectinacetylsterase protein Fragment                              |  |
| NbS00000680g0003.1 | 0.99  | 4.89   | 4.56 | -1.46499 | Sulfate transporter                                               |  |
| NbS00028378g0002.1 | 10.77 | 49.82  | 4.59 | -1.84184 | BURP domain containing protein                                    |  |
| NbS00014862g0017.1 | 1.80  | 8.66   | 4.61 | -1.77896 | Tetratricopeptide repeat TPR                                      |  |
| NbS00001173g0014.1 | 1.12  | 5.65   | 4.70 | -1.39539 | Auxin efflux carrier                                              |  |
| NbS00018169g0009.1 | 0.94  | 4.77   | 4.70 | -1.39377 | Serine carboxypeptidase                                           |  |
| NbS00008946g0009.1 | 1.34  | 6.70   | 4.73 | -1.34197 |                                                                   |  |
| NbS00013555g0004.1 | 4.18  | 20.68  | 4.85 | -1.58857 | Xyloglucan endotransglucosylase/hydrolyase 9                      |  |
| NbS00017657g0002.1 | 1.89  | 9.62   | 4.89 | -1.61666 | UDP glucosyltransferase family 1 protein                          |  |
| NbS00030404g0006.1 | 0.68  | 3.72   | 4.91 | -1.02663 | P loop containing nucleoside triphosphate hydrolases              |  |
| NbS00030446g0004.1 | 0.61  | 3.42   | 4.93 | -1.52796 | Subtilisin protease                                               |  |
| NbS00001344g0014.1 | 0.03  | 0.57   | 5.10 | -1.18972 | Os01g0917200 protein Fragment                                     |  |
| NbS00050570g0003.1 | 1.45  | 7.82   | 5.12 | -1.35329 |                                                                   |  |
| NbS00020801g0017.1 | 2.55  | 13.54  | 5.14 | -1.61663 | Epoxide hydrolase 2                                               |  |
| NbS00008008g0014.1 | 0.46  | 2.82   | 5.20 | -1.31574 | Nitrate transporter                                               |  |
| NbS00003547g0001.1 | 0.37  | 2.38   | 5.31 | -1.00053 | Bcl-2 binding anthanogene 1                                       |  |
| NbS00024269g0011.1 | 0.45  | 2.84   | 5.33 | -1.58291 | Pentatricopeptide repeat containing protein chloroplastic         |  |
| NbS00007957g0021.1 | 0.60  | 3.71   | 5.42 | -1.71857 |                                                                   |  |
| NbS00027349g0010.1 | 0.57  | 3.52   | 5.43 | -1.63904 | J domain protein required for chloroplast accumulation response 1 |  |

|                    |       |        |      |          |                                                                                  |     |
|--------------------|-------|--------|------|----------|----------------------------------------------------------------------------------|-----|
| NbS00031400g0005.1 | 0.54  | 3.36   | 5.44 | -1.02192 | Alpha/beta Hydrolases                                                            |     |
| NbS00018866g0003.1 | 2.38  | 13.41  | 5.46 | -1.73185 | Aldo/keto reductase                                                              |     |
| NbS00044308g0002.1 | 0.71  | 4.33   | 5.48 | -1.31574 | UDP glycosyltransferase<br>73C1                                                  |     |
| NbS00013338g0011.1 | 0.53  | 3.39   | 5.53 | -1.05136 | Violaxanthin de epoxidase<br>chloroplastic                                       |     |
| NbS00058503g0006.1 | 0.71  | 4.39   | 5.54 | -1.6592  | Cellulose synthase                                                               |     |
| NbS00007667g0008.1 | 0.15  | 1.30   | 5.55 | -1.08561 | Protein of unknown function<br>DUF547                                            |     |
| NbS00015926g0011.1 | 0.67  | 4.23   | 5.64 | -1.25231 | UDP glycosyltransferase<br>73C3                                                  |     |
| NbS00013500g0008.1 | 1.31  | 7.89   | 5.67 | -1.29375 | Unknown protein                                                                  |     |
| NbS00043176g0004.1 | 0.04  | 0.69   | 5.72 | -1.18972 | Armadillo/beta catenin repeat                                                    |     |
| NbS00032996g0005.1 | 0.20  | 1.61   | 5.74 | -1.15604 | Rop guanine nucleotide<br>exchange factor 1                                      |     |
| NbS00017189g0001.1 | 25.35 | 146.72 | 5.77 | -2.03077 |                                                                                  |     |
| NbS00045061g0011.1 | 0.33  | 2.40   | 5.78 | -1.24231 | Long chain alcohol oxidase<br>FAO1                                               |     |
| NbS00004241g0002.1 | 2.83  | 16.94  | 5.81 | -1.90862 | Aspartic proteinase<br>nepenthesin 1                                             |     |
| NbS00059116g0016.1 | 24.42 | 143.55 | 5.86 | -2.23267 | Chitinase                                                                        |     |
| NbS00023863g0103.1 | 3.01  | 18.18  | 5.88 | -1.65078 |                                                                                  |     |
| NbS00013984g0021.1 | 91.98 | 543.71 | 5.91 | -2.35969 | Chitinase                                                                        |     |
| NbS00054535g0001.1 | 0.52  | 3.60   | 5.98 | -1.016   | Chloroplastic group IIA<br>intron splicing facilitator<br>CRS1 chloroplastic     |     |
| NbS00009579g0009.1 | 0.72  | 4.89   | 6.06 | -1.06491 | Class I heat shock protein                                                       | Yes |
| NbS00011583g0011.1 | 0.05  | 0.79   | 6.07 | -1.10474 | Mate efflux                                                                      |     |
| NbS00009083g0002.1 | 0.79  | 5.31   | 6.09 | -1.95925 | Beta galactosidase                                                               |     |
| NbS00034783g0009.1 | 0.59  | 4.17   | 6.16 | -1.12657 | Class II heat shock protein                                                      |     |
| NbS00007957g0022.1 | 0.35  | 2.69   | 6.20 | -1.34116 |                                                                                  |     |
| NbS00030877g0008.1 | 0.89  | 6.09   | 6.23 | -1.95197 | AE family transporter anion<br>exchange                                          |     |
| NbS00002197g0002.1 | 6.02  | 38.03  | 6.23 | -2.0204  | Glutathione S transferase<br>parC                                                |     |
| NbS00004735g0001.1 | 1.66  | 11.15  | 6.39 | -1.46103 | Class I heat shock protein                                                       |     |
| NbS00005291g0008.1 | 0.09  | 1.11   | 6.47 | -1.71631 | Sucrose phosphate synthase                                                       |     |
| NbS00012539g0001.1 | 0.06  | 0.92   | 6.49 | -1.01453 | Serine/threonine protein<br>phosphatase 2A regulatory<br>subunit delta 1 isoform |     |
| NbS00029951g0016.1 | 1.16  | 8.11   | 6.54 | -2.14571 | Unknown protein                                                                  |     |
| NbS00022964g0001.1 | 0.60  | 4.46   | 6.55 | -1.50737 | UDP glucosyltransferase 1                                                        |     |
| NbS00022499g0003.1 | 0.27  | 2.40   | 6.72 | -1.39367 | Protein WAX2                                                                     |     |



|                    |        |         |       |          |                                                                       |     |
|--------------------|--------|---------|-------|----------|-----------------------------------------------------------------------|-----|
| NbS00013984g0030.1 | 31.96  | 218.16  | 6.81  | -2.41788 |                                                                       |     |
| NbS00059116g0008.1 | 3.54   | 24.83   | 6.85  | -1.62462 |                                                                       |     |
| NbS00025192g0008.1 | 0.07   | 1.11    | 6.97  | -1.50187 | Tetratricopeptide repeat protein 7A                                   |     |
| NbS00006672g0042.1 | 0.05   | 0.98    | 6.97  | -1.18972 | Leucine rich repeat receptor protein kinase                           |     |
| NbS00007018g0006.1 | 0.55   | 4.45    | 7.01  | -1.35007 | Class II heat shock protein                                           |     |
| NbS00011805g0001.1 | 1.61   | 12.16   | 7.19  | -1.2426  | CP12                                                                  |     |
| NbS00013343g0015.1 | 172.28 | 1254.38 | 7.28  | -2.65588 | Osmotin protein Fragment                                              |     |
| NbS00044431g0007.1 | 1.19   | 9.31    | 7.30  | -1.69746 | Peroxidase                                                            |     |
| NbC26100965g0001.1 | 0.07   | 1.12    | 7.37  | -1.10474 | CBL interacting protein kinase 6                                      |     |
| NbS00033938g0008.1 | 1.88   | 14.59   | 7.43  | -1.90394 | Blue copper protein Fragment                                          |     |
| NbS00007957g0008.1 | 0.23   | 2.40    | 7.49  | -1.62398 |                                                                       |     |
| NbS00003673g0010.1 | 88.80  | 673.07  | 7.57  | -2.65843 | Proteinase inhibitor I                                                |     |
| NbS00044570g0003.1 | 0.33   | 3.20    | 7.63  | -1.52609 | Transmembrane protein 205                                             |     |
| NbS00007307g0011.1 | 0.18   | 2.04    | 7.65  | -1.05198 | Ethylene responsive transcription factor 2a                           |     |
| NbS00010554g0005.1 | 0.76   | 6.60    | 7.75  | -2.13341 | Cytochrome P450                                                       |     |
| NbS00038435g0004.1 | 3.30   | 26.38   | 7.78  | -2.45691 | Cytochrome P450                                                       | Yes |
| NbS00025860g0007.1 | 1.60   | 13.34   | 7.89  | -2.23463 | Class I heat shock protein                                            |     |
| NbS00040444g0001.1 | 218.41 | 1727.60 | 7.91  | -2.75922 | Bifunctional inhibitor/lipid transfer protein/seed storage 2S albumin |     |
| NbS00015751g0019.1 | 0.00   | 0.70    | 8.02  | -1.67653 | CHY zinc finger containing protein                                    |     |
| NbS00026613g0002.1 | 279.52 | 2259.85 | 8.08  | -2.82498 | Osmotin protein Fragment                                              |     |
| NbS00040444g0002.1 | 11.04  | 90.19   | 8.10  | -2.4383  |                                                                       |     |
| NbS00040444g0003.1 | 16.66  | 138.80  | 8.29  | -2.39912 |                                                                       |     |
| NbS00013631g0006.1 | 8.81   | 75.10   | 8.44  | -2.74815 | Purple acid phosphatase                                               |     |
| NbC25315011g0002.1 | 1.56   | 14.04   | 8.51  | -1.17076 | Peroxidase 4                                                          |     |
| NbS00012817g0004.1 | 0.17   | 2.31    | 8.92  | -1.61985 | Serine/threonine protein kinase                                       |     |
| NbS00000956g0001.1 | 32.11  | 290.52  | 9.02  | -2.81913 |                                                                       |     |
| NbS00030269g0107.1 | 2.46   | 23.32   | 9.15  | -2.69126 |                                                                       |     |
| NbS00032813g0006.1 | 0.33   | 4.11    | 9.86  | -2.02226 | Peptide transporter                                                   |     |
| NbS00040816g0003.1 | 0.32   | 4.41    | 10.70 | -1.34895 | Heat shock protein                                                    |     |
| NbS00009619g0006.1 | 1.44   | 16.84   | 11.01 | -2.70797 | Heat stress transcription factor                                      |     |
| NbS00010925g0003.1 | 7.17   | 80.01   | 11.02 | -2.86213 | Uncharacterized protein LOC100782725                                  |     |
| NbS00057756g0005.1 | 0.39   | 6.90    | 14.27 | -2.66446 | Beta glucosidase                                                      |     |

|                    |         |        |        |          |                                                                                |     |
|--------------------|---------|--------|--------|----------|--------------------------------------------------------------------------------|-----|
| NbC24295021g0001.1 | 0.56    | 9.57   | 14.61  | -1.68359 | Protein CHUP1 chloroplastic                                                    |     |
| NbC25233207g0001.1 | 1.23    | 19.74  | 14.95  | -1.59557 | Class I heat shock protein                                                     | Yes |
| NbS00018954g0001.1 | 0.00    | 1.66   | 17.62  | -1.67653 | Terpene synthase 21                                                            |     |
| NbS00034783g0004.1 | 0.15    | 4.48   | 18.12  | -1.94559 | Class II heat shock protein                                                    | Yes |
| NbS00007436g0026.1 | 0.39    | 10.02  | 20.56  | -2.9996  |                                                                                |     |
| NbS00009355g0029.1 | 0.00    | 5.87   | 59.66  | -1.27003 |                                                                                |     |
| NbS00002437g0006.1 | 1.43    | 6.64   | 4.42   | -1.63673 | Hypothetical protein<br>VITISV_033286                                          |     |
| NbS00036752g0007.1 | 0.31    | 1.76   | 4.54   | -1.29894 | Receptor kinase RLK                                                            |     |
| NbS00019972g0004.1 | 2.01    | 10.87  | 5.19   | -1.90916 | Alpha 1 4 glucan<br>phosphorylase L 2 isozyme<br>2C chloroplastic/amyloplastic |     |
| NbS00003844g0006.1 | 0.43    | 3.21   | 6.23   | -1.21445 | FAD binding domain<br>containing protein                                       |     |
| NbS00006399g0017.1 | 0.28    | 2.47   | 6.79   | -1.56236 | Filament plant protein<br>Fragment                                             |     |
| NbS00035831g0003.1 | 0.08    | 1.55   | 9.28   | -1.34615 | GNOM 1                                                                         |     |
| NbC24805505g0002.1 | 1.03    | 14.31  | 12.74  | -2.08619 | Cytochrome P450                                                                | Yes |
| NbC25673618g0001.1 | 0.22    | 5.17   | 16.55  | -2.18426 | Cytochrome P450                                                                | Yes |
| NbS00058627g0001.1 | 5.96    | 0.00   | -60.61 | 1.87842  | Acetyl coenzyme A cis 3<br>hexen 1 ol acetyl transferase                       |     |
| NbS00040042g0003.1 | 4.58    | 0.00   | -46.79 | 1.87842  |                                                                                |     |
| NbS00003530g0014.1 | 14.25   | 0.21   | -46.18 | 3.42424  | Heavy metal<br>transport/detoxification                                        |     |
| NbS00008926g0005.1 | 6.65    | 0.24   | -19.73 | 2.63452  | Vacuolar sorting protein 4b                                                    |     |
| NbS00027213g0001.1 | 18.83   | 0.86   | -19.67 | 2.56937  | Non specific lipid transfer<br>protein 2                                       |     |
| NbS00042659g0003.1 | 10.93   | 0.52   | -17.87 | 2.23609  |                                                                                |     |
| NbS00045440g0005.1 | 3673.56 | 220.34 | -16.67 | 4.09306  | Pathogenesis related protein<br>R major form                                   |     |
| NbS00060234g0001.1 | 4.43    | 0.17   | -16.49 | 1.94423  | Phosphoglycerate mutase                                                        |     |
| NbS00007655g0001.1 | 46.23   | 2.95   | -15.18 | 2.96717  | Non specific lipid transfer<br>protein 2                                       |     |
| NbS00009733g0019.1 | 12.21   | 0.71   | -15.18 | 2.39055  | Major allergen Pru ar 1                                                        |     |
| NbS00004868g0007.1 | 154.76  | 10.19  | -15.06 | 3.41136  | NBS LRR class disease<br>resistance protein                                    |     |
| NbS00052547g0003.1 | 24.47   | 1.54   | -14.95 | 3.19218  | Nudix hydrolase 2                                                              |     |
| NbS00004740g0003.1 | 14.48   | 1.04   | -12.78 | 2.31342  | Heavy metal associated<br>isoprenylated plant protein 26                       |     |
| NbS00049765g0001.1 | 23.68   | 1.76   | -12.77 | 2.34656  | Calcium binding protein<br>CML45                                               |     |
| NbS00017574g0006.1 | 12.61   | 0.92   | -12.48 | 2.92997  | Cathepsin B cysteine<br>proteinase                                             |     |

|                    |             |        |        |         |                                                                        |  |
|--------------------|-------------|--------|--------|---------|------------------------------------------------------------------------|--|
| NbS00004740g0002.1 | 3.73        | 0.21   | -12.45 | 1.40554 | Protein of unknown function<br>DUF538                                  |  |
| NbS00027996g0004.1 | 36.45       | 2.94   | -12.01 | 2.94605 | Cell number regulator 1                                                |  |
| NbS00011121g0004.1 | 6.90        | 0.52   | -11.25 | 1.9889  | Receptor protein kinase<br>At5g59670                                   |  |
| NbS00014933g0008.1 | 2.19        | 0.10   | -11.24 | 1.66105 |                                                                        |  |
| NbS00025385g0006.1 | 39.41       | 3.42   | -11.21 | 3.18331 | Phospholipase A1 IIgamma                                               |  |
| NbS00020486g0001.1 | 35.70       | 3.11   | -11.15 | 2.71265 |                                                                        |  |
| NbS00042659g0005.1 | 4532.8<br>0 | 406.80 | -11.14 | 3.5387  | PAR 1c protein                                                         |  |
| NbS00028666g0002.1 | 3.76        | 0.25   | -10.90 | 1.09596 | WRKY transcription factor 16                                           |  |
| NbS00023311g0013.1 | 11.20       | 1.00   | -10.29 | 2.85808 | Solute carrier family 2<br>facilitated glucose transporter<br>member 5 |  |
| NbS00025657g0014.1 | 2.70        | 0.17   | -10.22 | 2.04628 | Exostosin                                                              |  |
| NbS00053606g0003.1 | 29.36       | 2.78   | -10.22 | 3.05125 | AAA ATPase                                                             |  |
| NbS00032250g0015.1 | 1.46        | 0.06   | -10.04 | 2.0072  | Protein phosphatase 2C                                                 |  |
| NbS00004308g0002.1 | 281.51      | 28.85  | -9.73  | 3.13107 |                                                                        |  |
| NbS00003161g0001.1 | 2.23        | 0.14   | -9.68  | 1.20656 | Unknown protein                                                        |  |
| NbS00012876g0003.1 | 3.00        | 0.22   | -9.57  | 1.81955 | Metacaspase                                                            |  |
| NbC24762244g0001.1 | 2.42        | 0.16   | -9.56  | 1.09596 | Laccase                                                                |  |
| NbS00006288g0006.1 | 2.40        | 0.16   | -9.54  | 1.09596 | Calcium binding protein<br>CML10                                       |  |
| NbS00010244g0014.1 | 13.05       | 1.32   | -9.24  | 2.71417 | Inorganic phosphate<br>transporter                                     |  |
| NbS00007314g0014.1 | 1.44        | 0.07   | -9.17  | 1.66105 | Eukaryotic initiation factor<br>4A 8                                   |  |
| NbS00005040g0005.1 | 2.92        | 0.23   | -9.14  | 1.44299 |                                                                        |  |
| NbS00005579g0014.1 | 1.63        | 0.09   | -9.08  | 1.40554 | Exostosin                                                              |  |
| NbS00003110g0006.1 | 2.89        | 0.23   | -8.94  | 1.69141 | Cathepsin B cysteine<br>proteinase                                     |  |
| NbS00001820g0004.1 | 22.97       | 2.56   | -8.68  | 2.57563 |                                                                        |  |
| NbS00008166g0001.1 | 8.22        | 0.86   | -8.63  | 2.21688 | Pto Serine/threonine kinase<br>protein%2C resistance protein           |  |
| NbS00034797g0008.1 | 1.27        | 0.06   | -8.57  | 2.23609 | Calcium transporting ATPase<br>12 plasma membrane type                 |  |
| NbS00021769g0027.1 | 13.19       | 1.45   | -8.57  | 1.54705 |                                                                        |  |
| NbS00002551g0009.1 | 3.24        | 0.29   | -8.52  | 1.23079 |                                                                        |  |
| NbS00011054g0001.1 | 7.00        | 0.74   | -8.49  | 1.28183 |                                                                        |  |
| NbS00003513g0007.1 | 83.77       | 9.80   | -8.47  | 2.84407 |                                                                        |  |
| NbS00014955g0018.1 | 5.15        | 0.53   | -8.34  | 1.65275 | Unknown protein                                                        |  |
| NbS00006006g0011.1 | 29.26       | 3.45   | -8.26  | 2.70325 | Unknown protein                                                        |  |

|                    |        |       |       |         |                                                                |  |
|--------------------|--------|-------|-------|---------|----------------------------------------------------------------|--|
| NbS00005457g0204.1 | 32.88  | 3.94  | -8.16 | 2.60062 |                                                                |  |
| NbS00052331g0005.1 | 9.74   | 1.13  | -8.01 | 2.16241 | Glutamine amidotransferase<br>YLR126C                          |  |
| NbS00038068g0013.1 | 4.13   | 0.43  | -8.01 | 1.91174 | Vacuolar cation/proton<br>exchanger 5                          |  |
| NbS00015208g0005.1 | 3.44   | 0.34  | -8.00 | 1.07012 | WRKY transcription factor 16                                   |  |
| NbS00025445g0003.1 | 1.82   | 0.14  | -7.89 | 1.44299 | Beta carotene hydroxylase 2                                    |  |
| NbS00004485g0001.1 | 11.76  | 1.48  | -7.49 | 1.4425  | Calcium binding protein<br>PBP1                                |  |
| NbS00016881g0014.1 | 3.38   | 0.37  | -7.37 | 1.54705 | Core 2/I branching beta 1 6 N<br>acetylglucosaminyltransferase |  |
| NbS00028927g0001.1 | 4.35   | 0.51  | -7.24 | 1.09298 | Auxin induced SAUR protein                                     |  |
| NbS00005386g0003.1 | 120.42 | 16.62 | -7.21 | 2.62386 | BON1 associated protein 2                                      |  |
| NbS00025385g0005.1 | 518.62 | 72.04 | -7.19 | 2.85803 | Cathepsin B cysteine<br>proteinase 5                           |  |
| NbS00042475g0001.1 | 77.86  | 10.87 | -7.11 | 2.52592 | BON1 associated protein 2                                      |  |
| NbS00014697g0001.1 | 6.70   | 0.86  | -7.11 | 1.30951 | SKP1 protein 1                                                 |  |
| NbS00004569g0028.1 | 24.39  | 3.37  | -7.05 | 2.50497 | Phosphoglycerate mutase                                        |  |
| NbS00033675g0003.1 | 34.77  | 4.89  | -6.99 | 2.34157 | Calcium binding protein<br>CML45                               |  |
| NbS00019421g0014.1 | 68.76  | 9.89  | -6.89 | 2.5536  | Cysteine rich repeat secretory<br>protein 12                   |  |
| NbS00031545g0001.1 | 26.54  | 3.81  | -6.81 | 2.25933 | Soybean gene regulated by<br>cold 2                            |  |
| NbS00028900g0005.1 | 14.38  | 2.05  | -6.72 | 2.29882 | Cathepsin B cysteine<br>proteinase                             |  |
| NbS00037868g0004.1 | 87.97  | 13.03 | -6.70 | 2.54925 | UPF0497 membrane protein<br>17                                 |  |
| NbS00007391g0001.1 | 47.78  | 7.11  | -6.64 | 2.19524 |                                                                |  |
| NbS00032991g0003.1 | 50.56  | 7.55  | -6.62 | 2.3864  | Soybean gene regulated by<br>cold 2                            |  |
| NbS00034618g0001.1 | 5.29   | 0.72  | -6.61 | 1.07576 | Unknown protein                                                |  |
| NbS00004020g0003.1 | 5.91   | 0.81  | -6.61 | 1.81199 | Beta carotene hydroxylase 2                                    |  |
| NbS00004868g0004.1 | 27.03  | 4.02  | -6.58 | 1.90706 | Unknown protein                                                |  |
| NbS00021769g0011.1 | 18.13  | 2.71  | -6.49 | 2.02864 |                                                                |  |
| NbS00016628g0001.1 | 8.76   | 1.30  | -6.33 | 1.35222 | Hypothetical protein                                           |  |
| NbS00027430g0009.1 | 13.57  | 2.07  | -6.30 | 2.03865 | RING H2 finger protein<br>ATL22                                |  |
| NbS00009695g0005.1 | 1.10   | 0.09  | -6.17 | 1.30499 | Transmembrane 9 member 4                                       |  |
| NbS00005203g0009.1 | 2.81   | 0.38  | -6.06 | 1.33335 | Alternative oxidase<br>mitochondrial                           |  |
| NbS00018731g0020.1 | 1.28   | 0.13  | -5.97 | 1.51983 | Calcium transporting ATPase<br>13 plasma membrane type         |  |

|                    |         |        |       |         |                                                       |  |
|--------------------|---------|--------|-------|---------|-------------------------------------------------------|--|
| NbS00047839g0003.1 | 8.32    | 1.34   | -5.86 | 1.91897 | Beta carotene hydroxylase 2                           |  |
| NbS00006310g0007.1 | 4.02    | 0.61   | -5.84 | 1.25359 | ATP dependent RNA helicase eIF4A                      |  |
| NbS00007436g0003.1 | 11.33   | 1.86   | -5.84 | 1.70332 | Sterile alpha motif SAM domain containing protein     |  |
| NbS00038702g0003.1 | 6.01    | 0.95   | -5.83 | 1.08714 | Hypothetical protein VITISV_009284                    |  |
| NbS00000634g0108.1 | 1.70    | 0.21   | -5.81 | 1.02422 |                                                       |  |
| NbS00024411g0009.1 | 2560.68 | 447.16 | -5.73 | 2.58612 | Endochitinase Chitinase                               |  |
| NbS00018281g0007.1 | 12.41   | 2.09   | -5.72 | 1.15331 |                                                       |  |
| NbS00026817g0018.1 | 10.43   | 1.76   | -5.68 | 1.95974 | Uncharacterized protein LOC100853376                  |  |
| NbS00006309g0017.1 | 10.82   | 1.86   | -5.57 | 1.95386 |                                                       |  |
| NbS00022684g0002.1 | 10.02   | 1.72   | -5.55 | 1.55504 | Unknown protein                                       |  |
| NbS00011363g0101.1 | 11.20   | 1.95   | -5.51 | 1.0188  |                                                       |  |
| NbS00045861g0002.1 | 71.77   | 13.11  | -5.44 | 2.18196 | Unknown protein                                       |  |
| NbS00012621g0108.1 | 37.74   | 6.87   | -5.43 | 2.00347 |                                                       |  |
| NbS00024669g0003.1 | 29.34   | 5.36   | -5.39 | 2.08095 | Acetyl coenzyme A cis 3 hexen 1 ol acetyl transferase |  |
| NbS00035332g0014.1 | 6.33    | 1.10   | -5.34 | 1.0188  | Basic helix loop helix                                |  |
| NbS00028303g0001.1 | 7.63    | 1.35   | -5.32 | 1.68147 | Ankyrin repeat containing protein                     |  |
| NbS00011648g0011.1 | 16.07   | 2.96   | -5.29 | 2.21667 | ARGONAUTE 1                                           |  |
| NbS00001236g0045.1 | 12.10   | 2.22   | -5.26 | 2.07921 | Subtilisin protease                                   |  |
| NbS00009990g0011.1 | 7.76    | 1.39   | -5.26 | 1.66223 | Copper ion binding protein                            |  |
| NbS00045727g0001.1 | 142.44  | 27.26  | -5.21 | 2.23126 | Disease resistance response                           |  |
| NbS00026127g0018.1 | 87.11   | 16.75  | -5.18 | 2.15418 | NAC domain transcription factor                       |  |
| NbS00053630g0004.1 | 161.08  | 31.23  | -5.15 | 2.36766 | Acetyl coenzyme A cis 3 hexen 1 ol acetyl transferase |  |
| NbS00055998g0002.1 | 70.61   | 13.66  | -5.14 | 2.05891 | Unknown protein                                       |  |
| NbS00025974g0007.1 | 14.75   | 2.89   | -4.97 | 1.81956 | Unknown protein                                       |  |
| NbS00017742g0008.1 | 7.68    | 1.47   | -4.96 | 1.90637 | NAC domain protein                                    |  |
| NbS00061402g0001.1 | 95.80   | 19.37  | -4.93 | 2.07745 | Copper transporter                                    |  |
| NbS00002289g0008.1 | 22.27   | 4.47   | -4.90 | 2.10636 | Vacuolar sorting receptor 7                           |  |
| NbS00033080g0001.1 | 16.17   | 3.23   | -4.88 | 1.49837 | Unknown protein                                       |  |
| NbS00016343g0003.1 | 842.55  | 172.87 | -4.87 | 2.29456 | Glycine rich protein                                  |  |
| NbS00009224g0003.1 | 8.29    | 1.64   | -4.84 | 1.65217 | Fasciclin arabinogalactan protein 18                  |  |
| NbS00031370g0112.1 | 2.98    | 0.54   | -4.81 | 1.10051 |                                                       |  |
| NbS00030820g0001.1 | 12.37   | 2.52   | -4.76 | 1.42449 | Unknown protein                                       |  |

|                    |         |        |       |         |                                                        |  |
|--------------------|---------|--------|-------|---------|--------------------------------------------------------|--|
| NbS00022638g0012.1 | 3.08    | 0.57   | -4.74 | 1.70449 |                                                        |  |
| NbS00022787g0012.1 | 16.12   | 3.33   | -4.73 | 1.7173  | HVA22 protein i                                        |  |
| NbS00061325g0006.1 | 0.81    | 0.09   | -4.71 | 1.33882 | LRR receptor serine/threonine protein kinase           |  |
| NbS00055076g0001.1 | 124.39  | 26.36  | -4.70 | 1.98795 | Unknown protein                                        |  |
| NbS00011088g0001.1 | 48.85   | 10.31  | -4.70 | 1.87825 | Calcium binding protein CML44                          |  |
| NbS00015242g0008.1 | 7.03    | 1.42   | -4.70 | 1.38318 | LOB domain protein 25                                  |  |
| NbS00029024g0002.1 | 95.88   | 20.37  | -4.69 | 1.90567 | Uncharacterized protein LOC100810725                   |  |
| NbS00054976g0001.1 | 17.82   | 3.73   | -4.67 | 1.69446 | Calcium binding protein CML30                          |  |
| NbS00002267g0005.1 | 7.80    | 1.59   | -4.67 | 1.18797 | Unknown protein                                        |  |
| NbS00047968g0010.1 | 10.95   | 2.27   | -4.66 | 1.72198 | RNA recognition motif containing protein               |  |
| NbS00030233g0002.1 | 3.80    | 0.74   | -4.62 | 1.35319 | Receptor protein kinase                                |  |
| NbS00036825g0003.1 | 57.00   | 12.26  | -4.62 | 2.03634 | E3 ubiquitin protein ligase RNF217                     |  |
| NbS00004056g0005.1 | 167.55  | 36.42  | -4.59 | 2.10171 | Glutaredoxin C9                                        |  |
| NbS00001433g0005.1 | 147.33  | 32.11  | -4.58 | 1.96798 |                                                        |  |
| NbS00044915g0003.1 | 54.63   | 11.86  | -4.58 | 2.08695 | Squalene monooxygenase                                 |  |
| NbS00001177g0011.1 | 17.17   | 3.71   | -4.54 | 1.92388 | Vacuolar iron transporter VIT                          |  |
| NbS00025701g0011.1 | 2.82    | 0.54   | -4.52 | 1.66127 | ARGONAUTE 1                                            |  |
| NbS00035332g0011.1 | 6.21    | 1.31   | -4.49 | 1.01433 | Basic helix loop helix                                 |  |
| NbS00010196g0001.1 | 10.00   | 2.15   | -4.49 | 1.60377 | Unknown protein                                        |  |
| NbS00007113g0017.1 | 1.74    | 0.31   | -4.48 | 1.27536 | WD 40 repeat                                           |  |
| NbS00008798g0006.1 | 1.58    | 0.28   | -4.48 | 1.0188  | Aspartate aminotransferase                             |  |
| NbC25742659g0003.1 | 2482.74 | 557.65 | -4.45 | 2.22705 | Glucan endo 1 3 beta glucosidase%2C acidic isoform GI9 |  |
| NbS00035466g0005.1 | 76.97   | 17.35  | -4.42 | 1.98208 | Cysteine rich repeat secretory protein 12              |  |
| NbS00010129g0001.1 | 2385.81 | 541.78 | -4.40 | 2.20982 | Beta 1 3 glucanase                                     |  |
| NbS00020273g0011.1 | 254.02  | 57.67  | -4.40 | 2.04108 | Pathogenesis related protein PR 4B                     |  |
| NbS00028343g0017.1 | 42.53   | 9.63   | -4.38 | 1.97157 | Ribose phosphate pyrophosphokinase 4                   |  |
| NbS00006199g0004.1 | 4.20    | 0.90   | -4.30 | 1.45466 | Inorganic phosphate transporter                        |  |
| NbS00007836g0001.1 | 625.86  | 146.44 | -4.27 | 2.11943 | Strictosidine synthase                                 |  |

|                    |        |       |       |         |                                                            |  |
|--------------------|--------|-------|-------|---------|------------------------------------------------------------|--|
| NbS00024261g0008.1 | 5.47   | 1.21  | -4.24 | 1.33809 | Ribose phosphate pyrophosphokinase 4                       |  |
| NbS00026420g0026.1 | 49.46  | 11.60 | -4.24 | 1.97122 | F box                                                      |  |
| NbS00010812g0004.1 | 12.79  | 2.95  | -4.22 | 1.65383 | F box protein PP2 B10                                      |  |
| NbS00016708g0006.1 | 5.55   | 1.24  | -4.20 | 1.66093 | Ubiquitin conjugating enzyme 23                            |  |
| NbS00036148g0004.1 | 37.34  | 8.81  | -4.20 | 1.80753 | WRKY transcription factor 9                                |  |
| NbS00019157g0035.1 | 11.93  | 2.78  | -4.18 | 1.57534 | Serine/threonine protein phosphatase 2C                    |  |
| NbS00043015g0001.1 | 61.06  | 14.62 | -4.15 | 1.87155 | Heavy metal associated domain containing protein expressed |  |
| NbS00054521g0001.1 | 13.99  | 3.31  | -4.13 | 1.72412 | MATE efflux DTX1                                           |  |
| NbS00023392g0005.1 | 6.78   | 1.57  | -4.12 | 1.58656 | Pectinesterase/pectinesterase inhibitor 25                 |  |
| NbS00003323g0003.1 | 22.21  | 5.33  | -4.11 | 1.57567 | Ribosomal protein alanine N acetyltransferase              |  |
| NbS00001559g0013.1 | 40.69  | 9.83  | -4.11 | 1.76128 | Armadillo/beta catenin repeat                              |  |
| NbS00059236g0004.1 | 14.71  | 3.53  | -4.08 | 1.72663 | Squalene monooxygenase                                     |  |
| NbS00031402g0006.1 | 14.07  | 3.39  | -4.06 | 1.10196 |                                                            |  |
| NbS00024147g0002.1 | 14.40  | 3.50  | -4.02 | 1.60117 | ATP binding protein                                        |  |
| NbS00014993g0001.1 | 9.78   | 2.36  | -4.02 | 1.16406 |                                                            |  |
| NbS00036311g0001.1 | 40.70  | 10.07 | -4.01 | 1.5432  |                                                            |  |
| NbS00014120g0117.1 | 194.65 | 47.50 | -4.09 | 1.99793 |                                                            |  |

**Table S2. Oligonucleotides used in this study**

| No. | Name                  | Sequence (from 5' to 3')                 | Usage                                                                     |
|-----|-----------------------|------------------------------------------|---------------------------------------------------------------------------|
| 1   | CRN115-F              | <u>cgcggatcc</u> ATGTTCCCAGTGGACATCGATGG | Insertion of <i>PsCRN115</i> without SP into pBinGFP2                     |
| 2   | CRN115-R              | <u>gctctaga</u> TCAGCTGAAATAACTAAACG     |                                                                           |
| 3   | NPTII-F               | TGACTGGGCACAACAGACAAT                    | Primers for <i>NPTII</i> , used for genomic PCR assay                     |
| 4   | NPTII-R               | AAGACCCCAACGAGAAGC                       |                                                                           |
| 5   | EF1 $\alpha$ -F       | AGAGGCCCTCAGACAAAC                       | Primers of <i>NbEF1<math>\alpha</math></i> , used for real time PCR assay |
| 6   | EF1 $\alpha$ -R       | TAGGTCCAAAGGTCACAA                       |                                                                           |
| 7   | PR1b-F                | GTGGACACTATACTCAGGTG                     | Primers of <i>NbPR1b</i> , used for real time PCR assay                   |
| 8   | PR1b-R                | TCCAACCTTGAATCAAAGGG                     |                                                                           |
| 9   | PR2b-F                | AGGTGTTTGCTATGGAATGC                     | Primers of <i>NbPR2b</i> , used for real time PCR assay                   |
| 10  | PR2b-R                | TCTGTACCCACCATCTTGC                      |                                                                           |
| 11  | RbohA-F               | GACTCGTTCCAGCGCTCATA                     | Primers of <i>NbRbohA</i> , used for real time PCR assay                  |
| 12  | RbohA-R               | TGTGCGAAATCGGAACGGTA                     |                                                                           |
| 13  | RbohB-F               | TCACAAGAGCTCAGGCGTTT                     | Primers of <i>NbRbohB</i> , used for real time PCR assay                  |
| 14  | RbohB-R               | TCATCGAACCGCTTCTCGAC                     |                                                                           |
| 15  | NbS00034783 g0004.1-F | ATGACAATGTGCTGCTGA                       | Primers for real time PCR assay                                           |
| 16  | NbS00034783 g0004.1-R | TTTTGGGTTTCTTAGGCT                       |                                                                           |
| 17  | NbC25233207 g0001.1-F | ATGAGAAGATTCAGGCTCC                      | Primers for real time PCR assay                                           |
| 18  | NbC25233207 g0001.1-R | GAACAGTTACAGTAAGCACTC                    |                                                                           |
| 19  | NbS00009579 g0009.1-F | ATTGGGCTTTCAGGTTC                        | Primers for real time PCR assay                                           |
| 20  | NbS00009579 g0009.1-R | TGCCACGTATCATTCTTCTC                     |                                                                           |
| 21  | NbC25673618 g0001.1-F | ATTCAGTCATTTTATCCCAAGA                   | Primers for real time PCR assay                                           |
| 22  | NbC25673618 g0001.1-R | TTACAAGCCCTGCCTACA                       |                                                                           |
| 23  | NbC24805505 g0002.1-F | TTTTGGCAGTGGAAGAAG                       | Primers for real time PCR assay                                           |



|    |                          |                        |                       |
|----|--------------------------|------------------------|-----------------------|
| 24 | NbC24805505<br>g0002.1-R | AGAGCAATAGTGCTAGACAGAG | PCR assay             |
| 25 | NbS00038435<br>g0004.1-F | TTGGTATTCGTAAGGGAC     | Primers for real time |
| 26 | NbS00038435<br>g0004.1-R | TAGGGGAGTAGATTTTGG     | PCR assay             |
